# Supplementary material for: Violet-light stimulated synaptic and learning functions in a zinc–tin oxide photoelectric transistor for neuromorphic computation
Source: Royal Society of Chemistry journal article supplement (doi:10.1039/d0ra08777g), 2020-01-01
Supplement: d0ra08777g1.pdf [file d0ra08777g1.pdf]

SUPPORTING INFORMATION

**Violet Light Stimulated Synaptic and Learning  
Functions in Zinc-Tin Oxide Photoelectric  
Transistor for Neuromorphic Computation**

**Ting-Ruei Lin, Li-Chung Shih, Po-Jen Cheng, Kuan-Ting Chen and Jen-Sue Chen\***

*\*Department of Materials Science and Engineering, National Cheng Kung University, Tainan 70101, Taiwan*

\* Corresponding author, E-mail: [jenschen@mail.ncku.edu.tw](mailto:jenschen@mail.ncku.edu.tw)

This supplementary material contains:

- (1) UV-Vis transmission spectrum of ZTO thin film and the extraction of optical bandgap. (Fig. S1)
- (2) O1s XPS spectrum of ZTO thin film. (Fig. S2).
- (3) Temperature-dependent photocurrent decay time for ZTO transistor and extraction of thermal activation energy for the neutralization of ionized oxygen vacancies. (Fig. S3)
- (4) Post-synaptic current of the ZTO phototransistor responses to 405nm light spikes of different power densities. (Fig. S4)

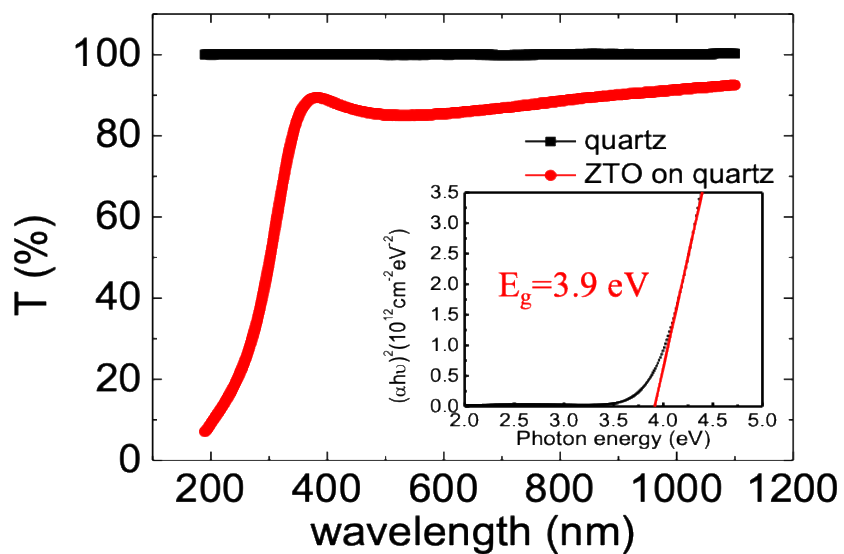

Figure S1 UV-Vis transmission spectrum of the solution-processed 15-layer ZTO thin film; the inset shows the corresponding tauc plot of  $(\alpha h\nu)^2$  as a function of photon energy for determination of the optical bandgap.

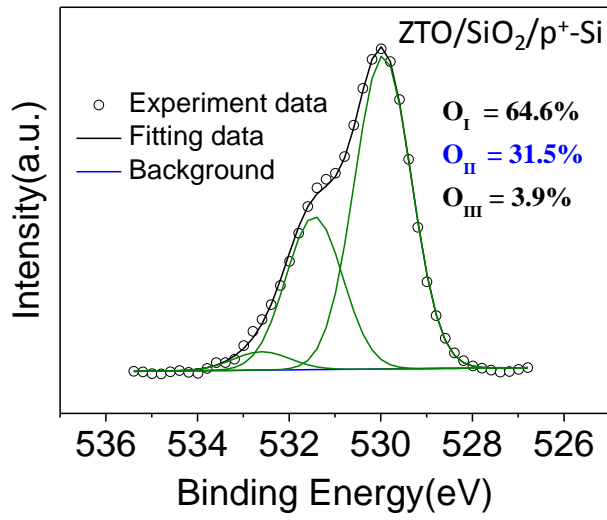

| O1s                                | BE (eV) |
|------------------------------------|---------|
| Lattice oxygen, O <sub>I</sub>     | 530.1   |
| Oxygen deficiency, O <sub>II</sub> | 531.8   |
| -OH group, O <sub>III</sub>        | 532.6   |

Figure S2 Deconvolution of the O1s XPS spectrum of ZTO deposited on the SiO<sub>2</sub>/p<sup>+</sup>-Si substrate.

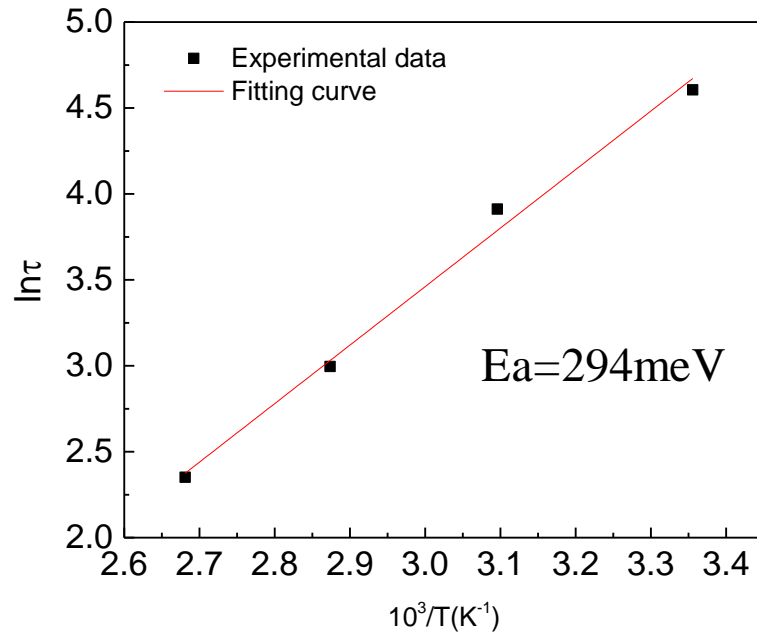

Figure S3 The temperature-dependent photocurrent decay time for ZTO transistor under 405 nm light illumination and extraction of thermal activation energy for the neutralization of ionized oxygen vacancies.

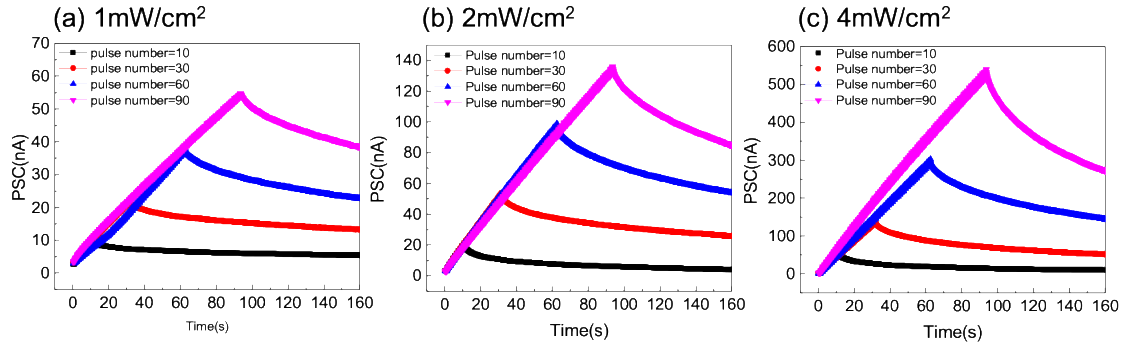

Figure S4 Post-synaptic current (PSC) of the ZTO phototransistor responses to 405nm light spikes of different power densities. (a) 1 mW/cm<sup>2</sup>, (b) 2 mW/cm<sup>2</sup>, (c) 4 mW/cm<sup>2</sup> (spike duration = 0.5 s, spike interval = 0.5 s, V<sub>D</sub> = 10V and V<sub>G</sub> = 0V).
